# Supplementary material for: MicroRNAs as Diagnostic and Prognostic Biomarkers in Ischemic Stroke—A Comprehensive Review and Bioinformatic Analysis
Source: MDPI journal article supplement (doi:10.3390/cells7120249), 2018-12-06
Supplement: s1 [file s1]

**Table S1. The key words used for screening the GO terms**

| <b>blood coagulation</b>                             | <b>platelet activation</b>                                                                                            | <b>inflammation process</b>                                                                          |
|------------------------------------------------------|-----------------------------------------------------------------------------------------------------------------------|------------------------------------------------------------------------------------------------------|
| coagulation                                          | platelet activation                                                                                                   | inflammatory response                                                                                |
| activation of blood coagulation via clotting cascade | platelet dense granule organization                                                                                   | negative regulation of inflammatory response                                                         |
| blood coagulation                                    | platelet degranulation                                                                                                | positive regulation of inflammatory response                                                         |
| blood coagulation, common pathway                    | platelet alpha granule lumen                                                                                          | inflammatory response to antigenic stimulus                                                          |
| blood coagulation, extrinsic pathway                 | platelet-derived growth factor receptor binding                                                                       | regulation of inflammatory response                                                                  |
| blood coagulation, fibrin clot formation             | positive regulation of cell proliferation by VEGF-activated platelet derived growth factor receptor signaling pathway | negative regulation of cytokine production involved in inflammatory response                         |
| blood coagulation, intrinsic pathway                 | negative regulation of platelet-derived growth factor receptor-beta signaling pathway                                 | negative regulation of connective tissue replacement involved in inflammatory response wound healing |
| negative regulation of blood coagulation             | negative regulation of platelet activation                                                                            | negative regulation of inflammatory response to wounding                                             |
| negative regulation of coagulation                   | platelet-derived growth factor receptor signaling pathway                                                             | acute inflammatory response to antigenic stimulus                                                    |
| positive regulation of blood coagulation             | cellular response to platelet-derived growth factor stimulus                                                          | positive regulation of cytokine production involved in inflammatory response                         |
| positive regulation of coagulation                   | platelet alpha granule                                                                                                | cytokine production involved in inflammatory response                                                |
| protein C inhibitor-coagulation factor V complex     | negative regulation of platelet aggregation                                                                           | acute inflammatory response                                                                          |
| protein C inhibitor-coagulation factor Xa complex    | platelet-derived growth factor binding                                                                                | positive regulation of acute inflammatory response                                                   |
| protein C inhibitor-coagulation factor XI complex    | platelet formation                                                                                                    | chronic inflammatory response                                                                        |
| regulation of blood coagulation                      | platelet morphogenesis                                                                                                | negative regulation of inflammatory response to antigenic stimulus                                   |
| regulation of blood coagulation, intrinsic pathway   | platelet dense tubular network membrane                                                                               | negative regulation of chronic inflammatory response                                                 |
| response to anticoagulant                            | platelet-derived growth factor receptor-beta signaling pathway                                                        | leukocyte chemotaxis involved in inflammatory response                                               |
|                                                      | platelet dense granule lumen                                                                                          | positive regulation of respiratory burst involved in inflammatory response                           |
|                                                      | platelet alpha granule membrane                                                                                       | regulation of chronic inflammatory response                                                          |

|  |                                                                  |                                                                                |
|--|------------------------------------------------------------------|--------------------------------------------------------------------------------|
|  | regulation of platelet aggregation                               | connective tissue replacement involved in inflammatory response wound healing  |
|  | platelet aggregation                                             | chronic inflammatory response to antigenic stimulus                            |
|  | platelet activating factor metabolic process                     | positive regulation of chronic inflammatory response to non-antigenic stimulus |
|  | serotonin secretion by platelet                                  |                                                                                |
|  | positive regulation of platelet-derived growth factor production |                                                                                |
|  | platelet dense tubular network                                   |                                                                                |

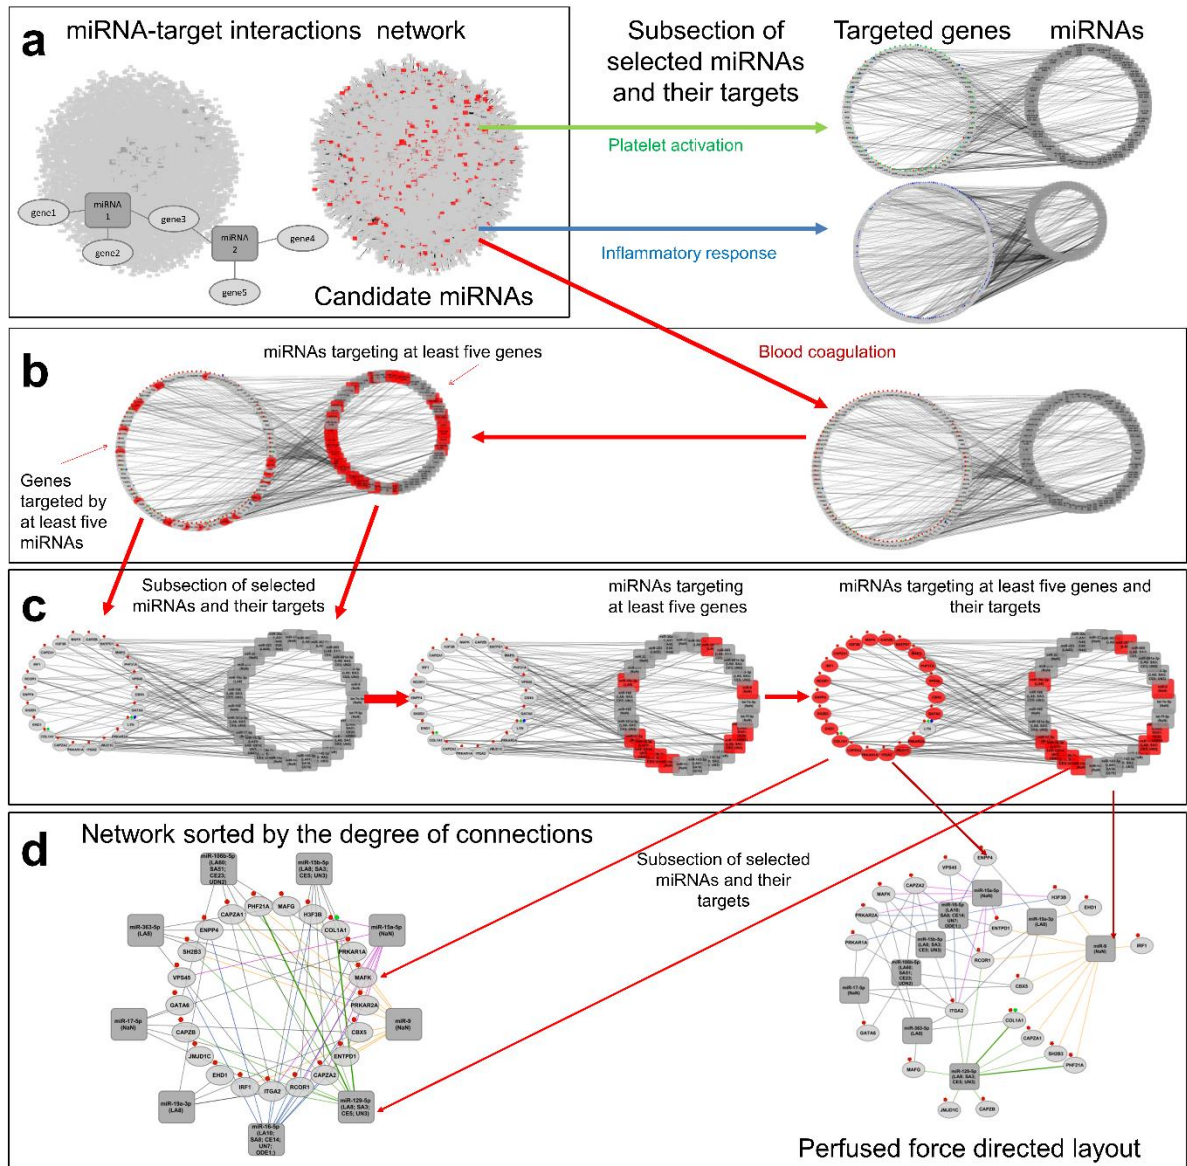

Figure S1. Bioinformatic workflow
